# Supplementary material for: Identification of piRNA Targets in Urinary Extracellular Vesicles for the Diagnosis of Prostate Cancer
Source: MDPI journal article supplement (doi:10.3390/diagnostics11101828), 2021-10-03
Supplement: s1 [file s1]

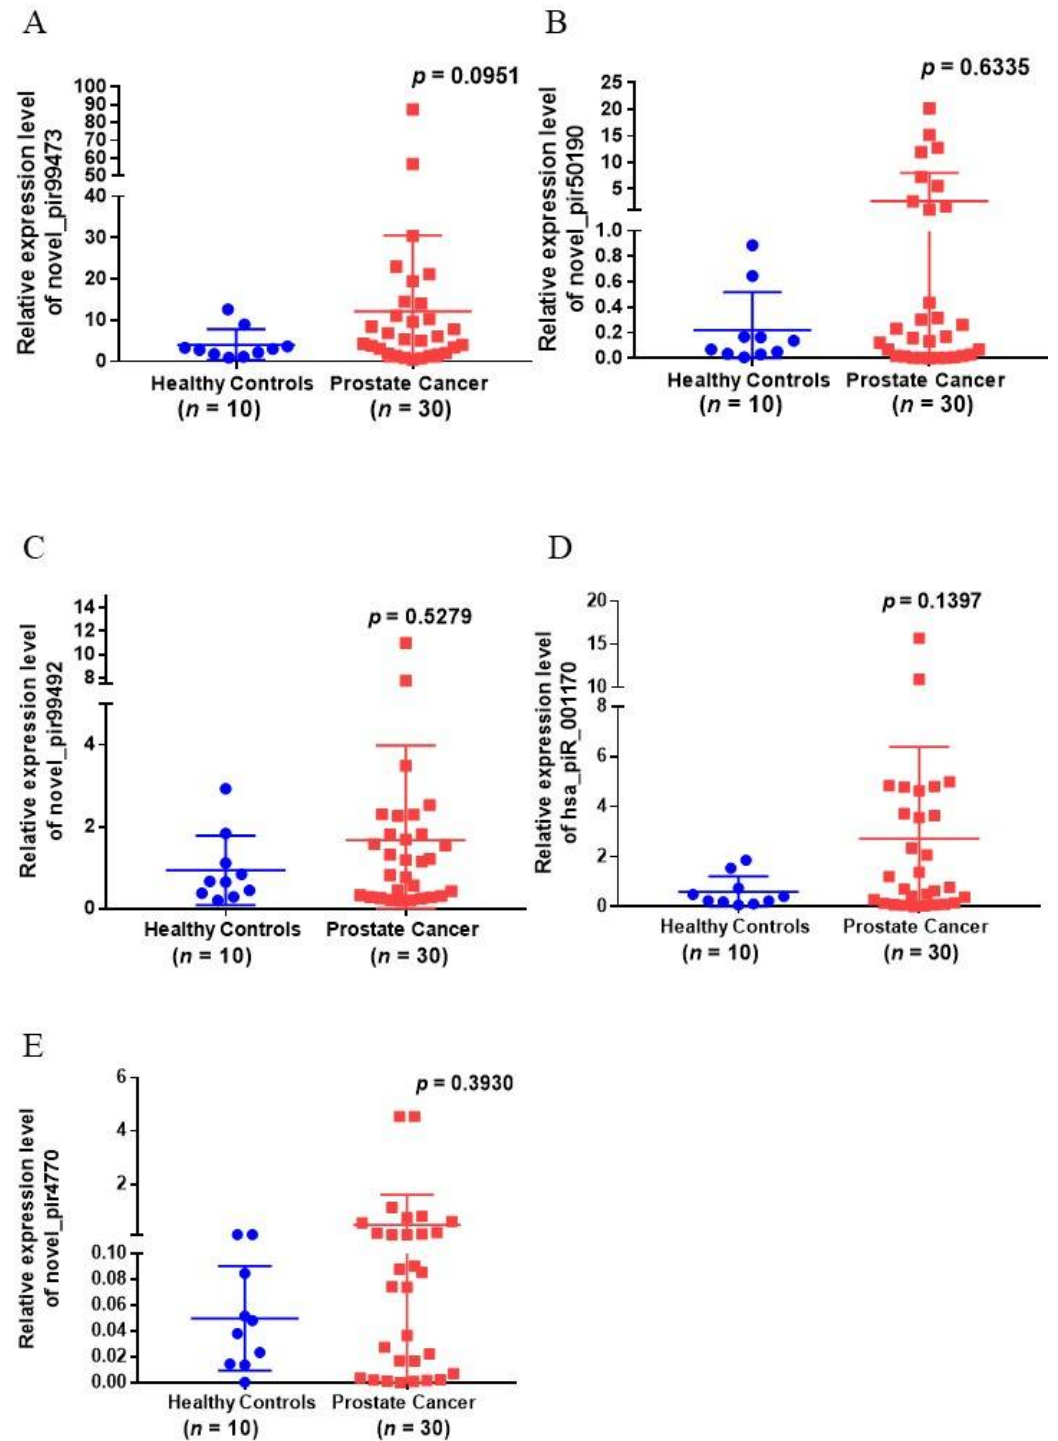

**Figure S1.** The expressions of novel\_pir99473, novel\_pir99492, novel\_pir44770, novel\_pir50190, and hsa\_piR\_001170 in validation cohorts. (A–E) Relative piRNA levels of novel\_pir99473 (A), novel\_pir50190 (B), novel\_pir99492 (C), hsa\_piR\_001170 (D) and novel\_pir44770 (E) in urinary EVs of PCa patients ( $n = 30$ ) and healthy controls ( $n = 10$ ) were investigated by qRT-PCR.

**Table S1.** Primer sequences for reverse transcription-quantitative polymerase chain reaction analysis.

| Name            | Sequence (5'-3')                 |
|-----------------|----------------------------------|
| novel_pir99473  | GCTCACACCTGTAATCCCAGCACTTTGGG    |
| novel_pir349843 | CTGAGGCAGGAGAATTGCTTGAACCTGGG    |
| novel_pir382289 | CTGAGGCAGGAGAATCACTTGAACCTGGG    |
| novel_pir158533 | TCTAATAGGGGTCCATGCTCCGTCTC       |
| novel_pir99492  | TCACACCTGTAATCCCAGCACTTTGGG      |
| novel_pir50190  | TCCTCTTTGCCTTCTGCCATGATTGTAAGT   |
| novel_pir4770   | TTGAAGAGGTCCTTCACGTCCCTTGTA      |
| novel_pir123744 | ACAACTGAGTGCTAATGTCGTCTAGA       |
| hsa_piR_001170  | ATAGGTTTGGTCCTAGCCTTTCTATTAGCTCT |
| hsa_piR_002468  | TCAGAAGATTCCAGGTTGACTCCTGG       |
| snU6            | GTGCTCGCTTCGGCAGCACATATACTAAAAT  |
|                 | TGGAACGATACAGAGAAGATTAGCATGGCCC  |
|                 | CTGCGCAAGGATGACACGCAAATTCGTGAAG  |
|                 | CGTTCCATATTTT                    |

**Table S2.** Number of total reads, and reads mapped to the genome per sample.

| Sample Name | Total Tag | Mapped Tag | Percentage (%) |
|-------------|-----------|------------|----------------|
| N1          | 20215587  | 16788307   | 83.05          |
| N2          | 24358924  | 19467563   | 79.92          |
| N3          | 22711052  | 19713651   | 86.8           |
| N4          | 26115591  | 19353199   | 74.11          |
| N5          | 22605472  | 21688961   | 95.95          |
| T1          | 23966853  | 21822634   | 91.05          |
| T2          | 25617658  | 22247645   | 86.84          |
| T3          | 20552966  | 18035370   | 87.75          |
| T4          | 23807970  | 23066238   | 96.88          |
| T5          | 20650510  | 18545425   | 89.81          |

**Table S3.** Summary of detected small non-coding RNA (sncRNA) for each sample.

| Sample Name | Known miRNA Count | Novel miRNA Count | Total miRNA Count | Known piRNA Count | Novel piRNA Count | Total piRNA Count | Known siRNA Count | Novel siRNA Count |
|-------------|-------------------|-------------------|-------------------|-------------------|-------------------|-------------------|-------------------|-------------------|
| N1          | 375               | 627               | 1002              | 156               | 8187              | 8343              | 0                 | 0                 |
| N2          | 345               | 2345              | 2690              | 188               | 31410             | 31598             | 0                 | 0                 |
| N3          | 285               | 1997              | 2282              | 166               | 18166             | 18332             | 0                 | 0                 |
| N4          | 343               | 288               | 631               | 133               | 13565             | 13698             | 0                 | 0                 |
| N5          | 404               | 5002              | 5406              | 121               | 39643             | 39764             | 0                 | 0                 |
| T1          | 373               | 2361              | 2734              | 153               | 21731             | 21884             | 0                 | 0                 |
| T2          | 344               | 452               | 796               | 195               | 2903              | 3098              | 0                 | 0                 |
| T3          | 358               | 5300              | 5658              | 221               | 47709             | 47930             | 0                 | 0                 |
| T4          | 307               | 7258              | 7565              | 194               | 60572             | 60766             | 0                 | 0                 |
| T5          | 406               | 4478              | 4884              | 182               | 44399             | 44581             | 0                 | 0                 |

**Table S4.** The list of piRNAs target genes related with PCa signaling pathways.

| piRNA id        | Target Gene Name | RNAhybrid MFE |
|-----------------|------------------|---------------|
| novel_pir382289 | MYC              | -21.3         |
| novel_pir382289 | GSK3B            | -29.6         |
| novel_pir382289 | AKT1             | -32.9         |
| novel_pir382289 | FOXO1            | -35.8         |
| novel_pir382289 | PIK3CA           | -26.6         |
| novel_pir382289 | KRAS             | -20.1         |
| novel_pir382289 | MAP2K7           | -20.9         |
| novel_pir349843 | MYC              | -20.3         |
| novel_pir349843 | GSK3B            | -30.3         |
| novel_pir349843 | PTEN             | -23.3         |
| novel_pir349843 | AKT1             | -33.2         |
| novel_pir349843 | FOXO1            | -33.3         |
| novel_pir349843 | PIK3CA           | -28.6         |
| novel_pir349843 | KRAS             | -22.5         |
| novel_pir349843 | MAP2K7           | -22.4         |
| novel_pir158533 | AR               | -23.7         |
| novel_pir158533 | GSK3B            | -22.3         |
| novel_pir158533 | mTOR             | -20.9         |
| novel_pir158533 | PIK3C2B          | -21.7         |
| hsa_piR_002468  | AR               | -27.4         |
| hsa_piR_002468  | PTEN             | -20.2         |
| hsa_piR_002468  | mTOR             | -27.1         |
| hsa_piR_002468  | FOXO1            | -25.8         |
| hsa_piR_002468  | PIK3C2B          | -28.8         |

MFE: Minimum free energy.

**Table S5.** The success rate of EVs RNA extraction under different methods.

| Methodology                                                  | Cases Amount | RNA Concentration in Successful Cases (ng/ $\mu$ L) | Successful Rate (Success/Fail) |
|--------------------------------------------------------------|--------------|-----------------------------------------------------|--------------------------------|
| Exosome isolation kit + Trizol LS                            | 8            | 1.27 - 3.37                                         | 37.5% (3/5)                    |
| Exosome isolation kit + NucleoSpin                           | 4            | 0.48                                                | 25% (1/3)                      |
| Frozen samples + Trizol LS                                   | 6            | 0.44 - 1.1                                          | 33% (2/4)                      |
| Fresh samples + Trizol LS                                    | 6            | 0.884 - 1.34                                        | 50% (3/3)                      |
| Frozen samples, ultracentrifugation + Trizol LS              | 5            | 0.526 - 9                                           | 40% (2/3)                      |
| Fresh samples, ultracentrifugation + Trizol LS               | 6            | 1.61                                                | 16.7% (1/5)                    |
| Frozen samples, 15% PEG6000, ultracentrifugation + Trizol LS | 5            | 0.55 - 1.8                                          | 100% (5/0)                     |
| Fresh samples, 15% PEG6000, ultracentrifugation + Trizol LS  | 33           | 0.4 - 20                                            | 63.6% (21/12)                  |

**Table S6.** Individual clinical features of HC and PCa patients in two cohorts.

| Screening Cohort  | Diagnosis | AGE (Years) | PSA (ng/mL) | TRUS-PV (mL) | Clinical T Stage | Gleason Score |
|-------------------|-----------|-------------|-------------|--------------|------------------|---------------|
| N1                | Benign    | 59          | 1.16        | N/A          | N/A              | N/A           |
| N2                | Benign    | 69          | 1.55        | N/A          | N/A              | N/A           |
| N3                | Benign    | 71          | 2.57        | N/A          | N/A              | N/A           |
| N4                | Benign    | 71          | 2.26        | N/A          | N/A              | N/A           |
| N5                | Benign    | 77          | 1.2         | N/A          | N/A              | N/A           |
| T1                | PCa       | 67          | 8.6         | 25           | T3a              | 3+3           |
| T2                | PCa       | 60          | 6.5         | 34           | T1c              | 3+4           |
| T3                | PCa       | 70          | 6.7         | 38           | T1c              | 3+3           |
| T4                | PCa       | 69          | 11.2        | 46           | T2a              | 3+3           |
| T5                | PCa       | 72          | 7           | N/A          | T2a              | 3+3           |
| Validation Cohort | Diagnosis | AGE (Years) | PSA (ng/mL) | TRUS-PV (mL) | Clinical T Stage | Gleason Score |
| N6                | Benign    | 70          | 0.6         | N/A          | N/A              | N/A           |
| N7                | Benign    | 70          | 0.68        | N/A          | N/A              | N/A           |
| N8                | Benign    | 60          | 1.34        | N/A          | N/A              | N/A           |
| N9                | Benign    | 64          | 2.1         | N/A          | N/A              | N/A           |
| N10               | Benign    | 61          | 2.33        | N/A          | N/A              | N/A           |
| N11               | Benign    | 82          | 3.12        | N/A          | N/A              | N/A           |
| N12               | Benign    | 65          | 3.3         | N/A          | N/A              | N/A           |
| N13               | Benign    | 62          | 3.61        | N/A          | N/A              | N/A           |
| N14               | Benign    | 62          | 3.85        | N/A          | N/A              | N/A           |
| N15               | Benign    | 76          | N/A         | N/A          | N/A              | N/A           |
| T6                | PCa       | 68          | 4.7         | 37.3         | T1c              | 3+3           |
| T7                | PCa       | 78          | 5.1         | 30           | T1c              | 3+3           |
| T8                | PCa       | 63          | 5.5         | 27           | T1c              | 3+3           |
| T9                | PCa       | 70          | 7.1         | 101          | T1c              | 3+3           |
| T10               | PCa       | 71          | 7.4         | 41           | T1c              | 3+3           |
| T11               | PCa       | 71          | 7.9         | 32           | T1c              | 3+3           |
| T12               | PCa       | 72          | 8           | 18           | T1c              | 3+3           |
| T13               | PCa       | 76          | 9.3         | 28           | T1               | 3+3           |
| T14               | PCa       | 59          | 9.8         | 25           | T1c              | 3+3           |
| T15               | PCa       | 71          | 13.9        | 36           | T1c              | 4+4           |
| T16               | PCa       | 75          | 1.9         | 9.3          | T2c              | 3+3           |
| T17               | PCa       | 79          | 5.1         | 30           | T2c              | 4+5           |
| T18               | PCa       | 69          | 6.5         | 31           | T2               | 3+4           |
| T19               | PCa       | 66          | 7           | 60           | T2c              | 3+3           |
| T20               | PCa       | 75          | 7.7         | 40           | T2b              | 4+5           |
| T21               | PCa       | 67          | 8.1         | 46           | T2               | 3+3           |
| T22               | PCa       | 67          | 8.6         | 25           | T2a              | 3+3           |
| T23               | PCa       | 59          | 8.8         | 25           | T2b              | 3+3           |
| T24               | PCa       | 69          | 9.9         | 40           | T2c              | 3+4           |
| T25               | PCa       | 63          | 10.3        | 43           | T2               | 3+4           |
| T26               | PCa       | 69          | 11          | 73           | T2               | 3+4           |
| T27               | PCa       | 64          | 11.2        | 46           | T2               | 3+4           |
| T28               | PCa       | 64          | 13          | 33.3         | T3a              | 4+5           |
| T29               | PCa       | 71          | 16.7        | 27           | T2c              | 3+4           |
| T30               | PCa       | 68          | 17.3        | 27           | T2b              | 3+4           |
| T31               | PCa       | 64          | 5.9         | 32.6         | T3a              | 3+3           |
| T32               | PCa       | 70          | 10.6        | 22.9         | T3a              | 3+4           |
| T33               | PCa       | 61          | 12.6        | 40           | T3b              | 3+4           |
| T34               | PCa       | 67          | 13.6        | 27.8         | T3b              | 4+5           |
| T35               | PCa       | 72          | 17.1        | 24           | T2c              | 3+4           |
